# Supplementary material for: Rank Pooling Approach for Wearable Sensor-Based ADLs Recognition
Source: MDPI journal article supplement (doi:10.3390/s20123463), 2020-06-19
Supplement: s1 [file s1]

*Supplementary*

# **Rank Pooling Approach for Wearable Sensor-based ADLs Recognition**

We have uploaded all supplementary material including our datasets, codes, results, confusion matrices, detailed description of atomic activity recognition on the following url:

[https://www.info.kindai.ac.jp/~shirahama/rank\\_pooling](https://www.info.kindai.ac.jp/~shirahama/rank_pooling)

User: rp

Pass: Atomic\_Composite
